# Supplementary material for: Intracranial Assessment of Androgen Receptor Antagonists in Mice Bearing Human Glioblastoma Implants
Source: MDPI journal article supplement (doi:10.3390/ijms25010332), 2023-12-26
Supplement: s1 [file s1]

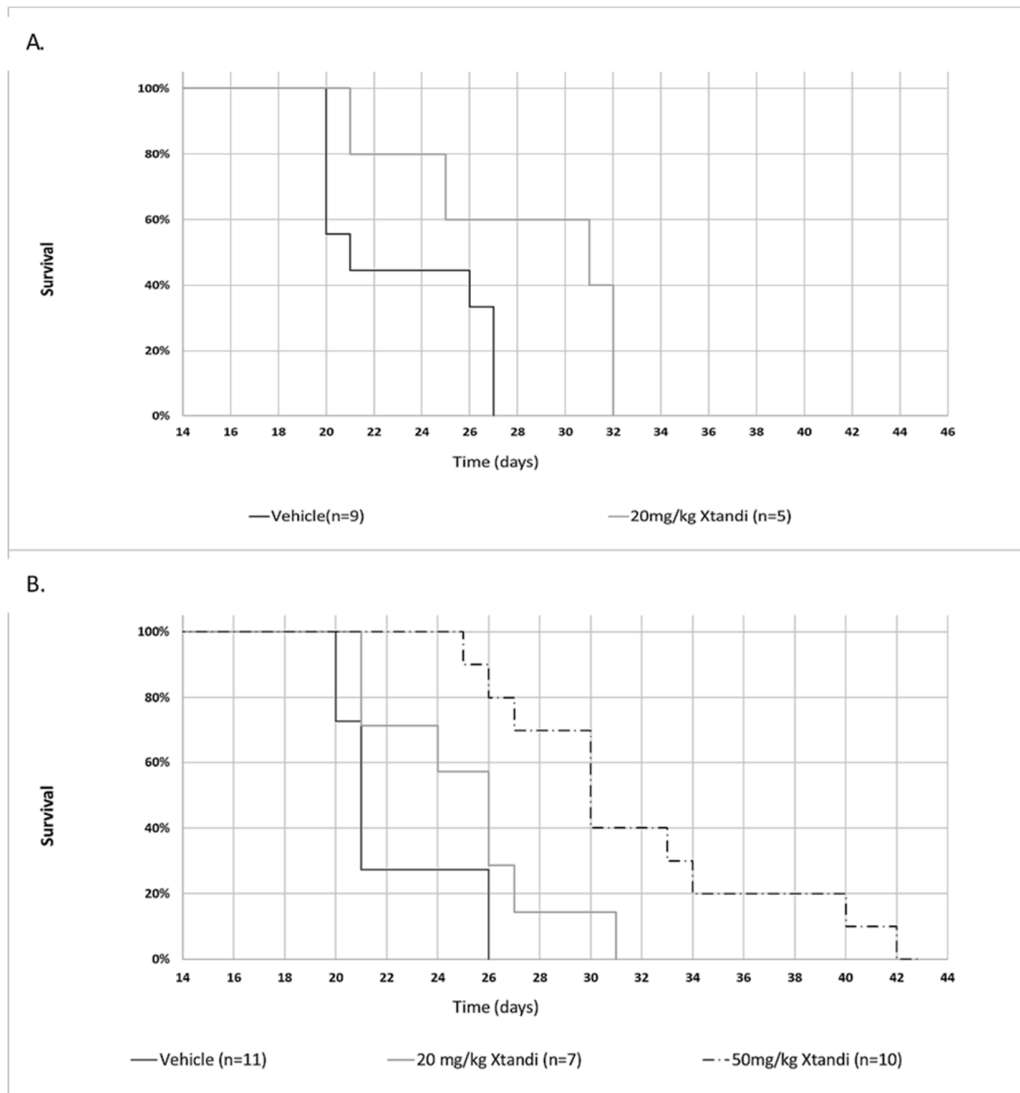

**Supplementary Figure S1. Kaplan-Meier Analysis of Nude Mice with Intracranial U87MG Human Glioblastoma Tumors Treated with enzalutamide (XTANDI).**

Nude mice with intracranial U87MG glioblastoma tumors were treated 5 times weekly with XTANDI or vehicle control. The survival of three groups was assessed: vehicle-treated mice (solid black line), mice treated with 20 mg/kg XTANDI (solid grey line), and mice treated with 50 mg/kg XTANDI (dash-dotted line).

- A.** an experiment involving a vehicle group (n = 9) and a group treated with 20 mg/kg XTANDI (n = 5), mice treated with XTANDI® (enzalutamide) at a dosage of 20 mg/kg exhibited a significant extension in lifespan compared to the vehicle-treated group (log-rank test;  $\chi^2 = 1.97$ ,  $p = 0.0484$ ).
- B.** an experiment comprising three study groups: vehicle (n = 11), 20 mg/kg XTANDI (n = 7), and 50 mg/kg XTANDI (n = 10), mice treated with XTANDI® at dosages of 20 mg/kg and 50 mg/kg demonstrated a significant extension in lifespan compared to the control group receiving vehicle treatment (log-rank test;  $z = 1.94$ ,  $p = 0.05$  and  $z = 3.91$ ,  $p < 0.001$ , respectively).
